# Supplementary material for: Structures and bonding properties of lithium polysulfide clusters LiSn−/0 (n = 3–5) and Li2S4−/0: size-selected anion photoelectron spectroscopy and theoretical calculations
Source: Royal Society of Chemistry journal article supplement (doi:10.1039/d2cp06061b), 2023-01-01
Supplement: d2cp06061b1.pdf [file d2cp06061b1.pdf]

## *Supplementary Material*

### **Structures and Bonding Properties of Lithium Polysulfide Clusters $\text{LiS}_n^{-/0}$ ( $n = 3-5$ ) and $\text{Li}_2\text{S}_4^{-/0}$ : Size-Selected Anion Photoelectron Spectroscopy and Theoretical Calculations**

Zhen-Chao Long,<sup>1,2</sup> Zhi-You Wei,<sup>1,2</sup> Kai-Wen Liu,<sup>1,2</sup> Xi-Long Li,<sup>1,2</sup> Xi-Ling Xu,<sup>1,2</sup> Hong-Guang Xu,<sup>1,2</sup> and Wei-Jun Zheng<sup>1,2\*</sup>

<sup>1</sup> *Beijing National Laboratory for Molecular Sciences (BNLMS), State Key Laboratory of Molecular Reaction Dynamics, Institute of Chemistry, Chinese Academy of Sciences, Beijing 100190, China*

<sup>2</sup> *University of Chinese Academy of Sciences, Beijing 100049, China*

\* Corresponding author. E-mail: [zhengwj@iccas.ac.cn](mailto:zhengwj@iccas.ac.cn)

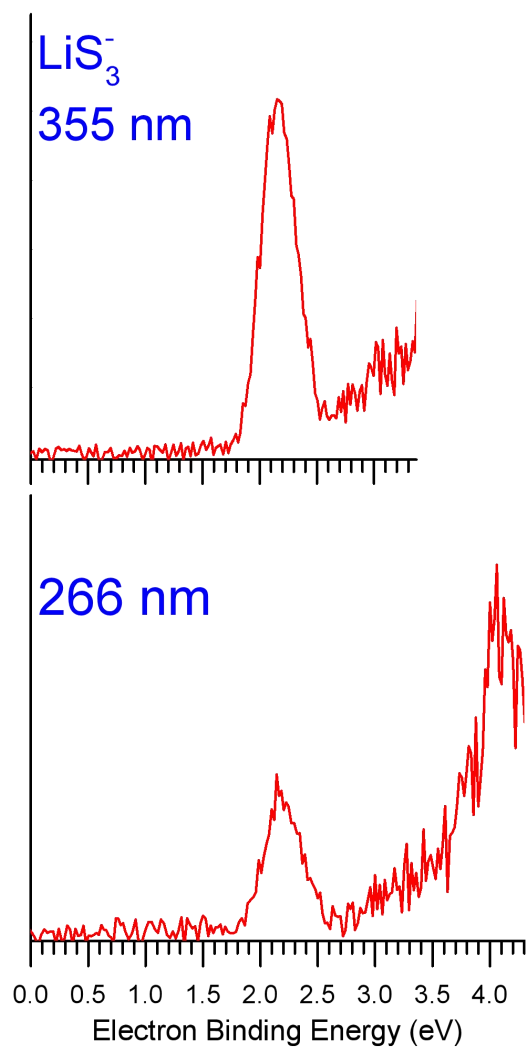

**FIG. S1.** Photoelectron spectra of  $\text{LiS}_3^-$  recorded at different wavelength.

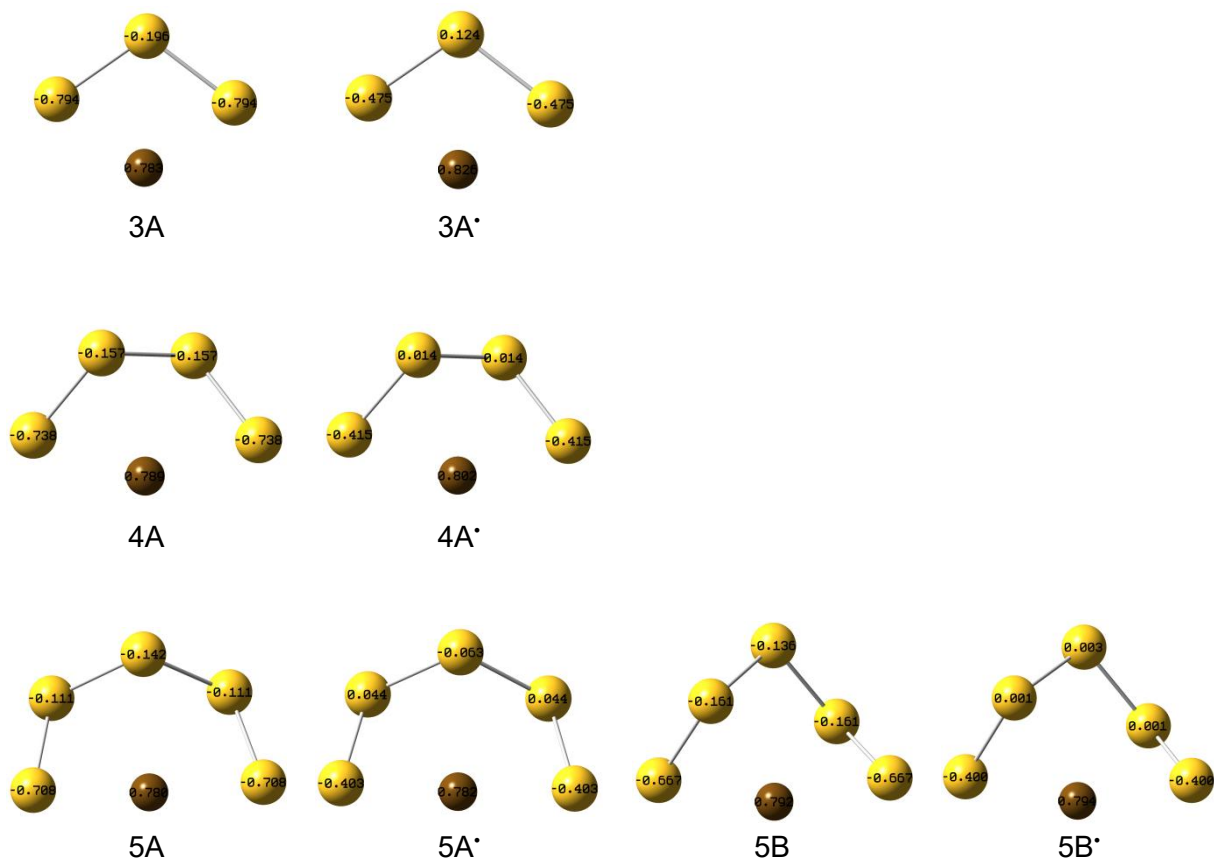

**FIG. S2.** The NPA charge distributions of the most stable structures of  $\text{LiS}_n^{n-}$  ( $n = 3-5$ ) based on the fixed anions' geometries. The calculations are conducted at the B3LYP/6-311+G(d) level. The brown and yellow balls represent lithium and sulfur atoms, respectively.

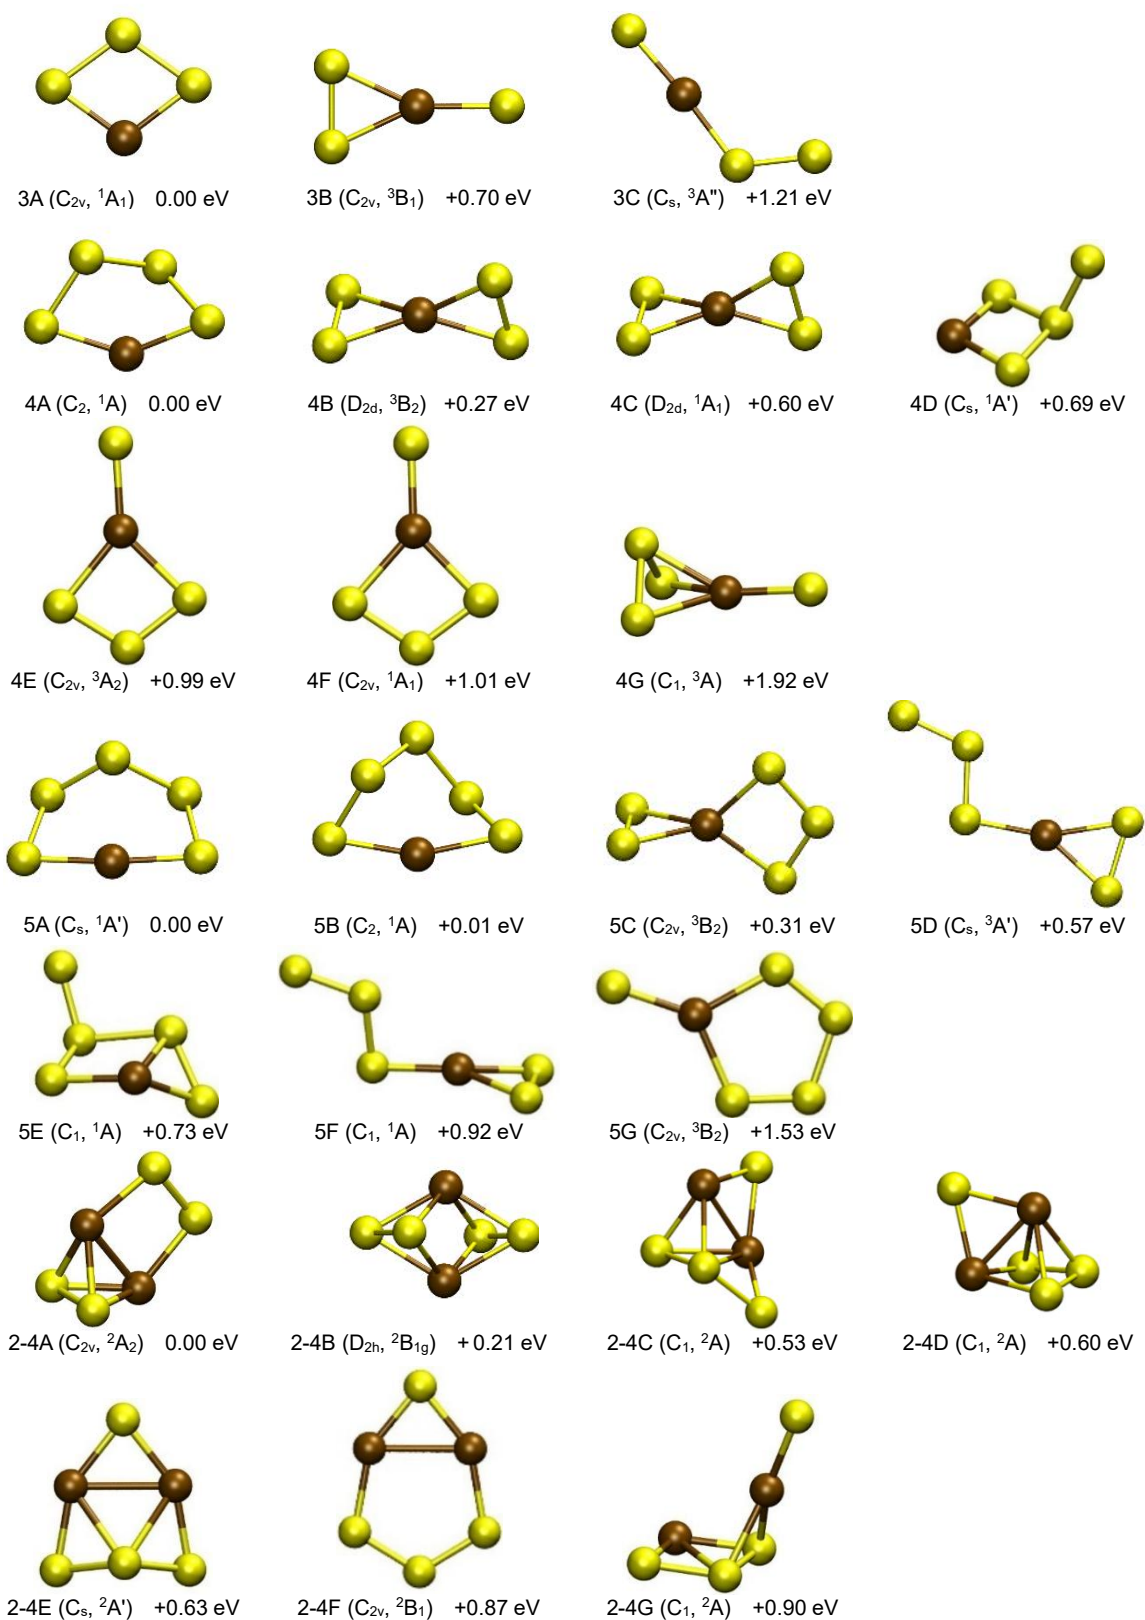

**FIG. S3.** Typical low-lying isomers of  $LiS_n^-$  ( $n = 3-5$ ) and  $Li_2S_4^-$ . The relative energies were calculated at the CCSD(T)/aug-cc-pVTZ//B3LYP/6-311+G(d) level and by including the zero-point energies (ZPEs) calculated at the B3LYP/6-311+G(d) level. The brown and yellow balls represent lithium and sulfur atoms, respectively.

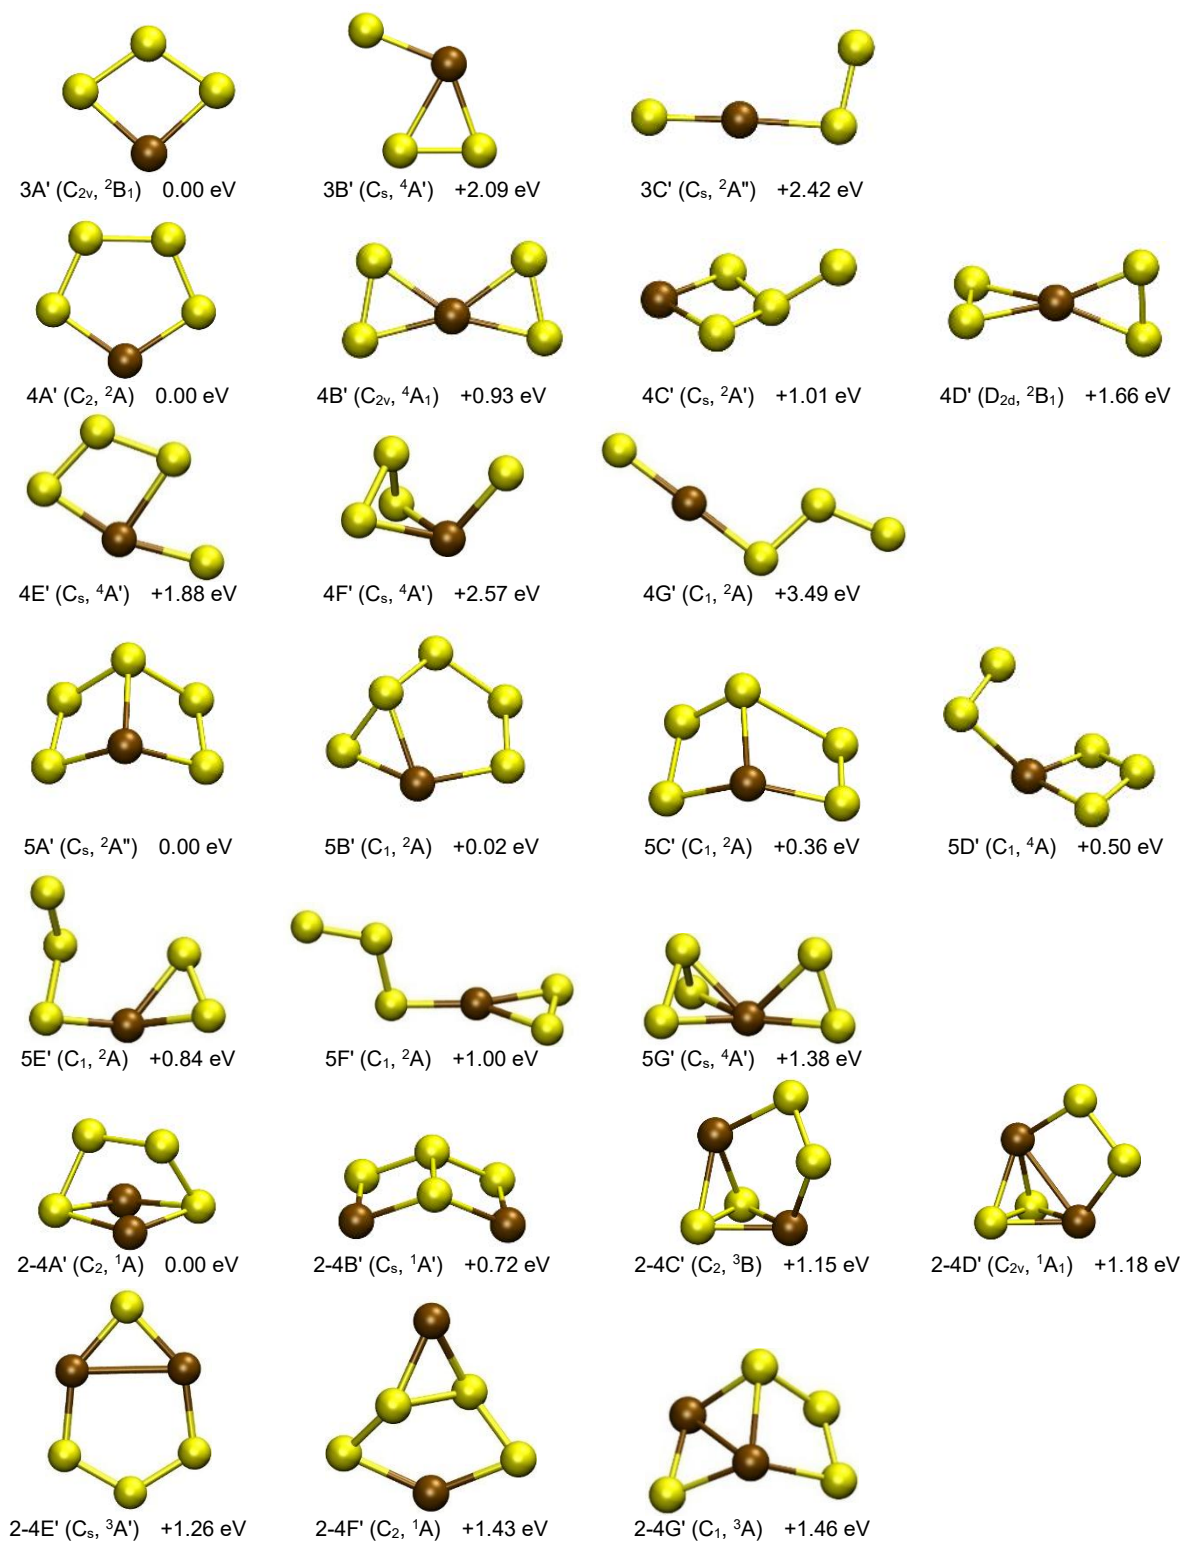

**FIG. S4.** Typical low-lying isomers of  $Li_3S_3$  ( $n = 3-5$ ) and  $Li_2S_4$ . The relative energies were calculated at the CCSD(T)/aug-cc-pVTZ//B3LYP/6-311+G(d) level and by including the zero-point energies (ZPEs) calculated at the B3LYP/6-311+G(d) level. The brown and yellow balls represent lithium and sulfur atoms, respectively.

**TABLE S1.** The Cartesian coordinates for the low-lying isomers of  $\text{LiS}_n^{-/0}$  ( $n = 3-5$ ) and  $\text{Li}_2\text{S}_4^{-/0}$  calculated at the B3LYP/6-311+G(d) level.

| <b><math>\text{LiS}_3^-</math></b> |             |             |             |    |             |             |             |
|------------------------------------|-------------|-------------|-------------|----|-------------|-------------|-------------|
| <b>3A</b>                          |             |             | <b>3B</b>   |    |             |             |             |
|                                    | X           | Y           | Z           |    | X           | Y           | Z           |
| S                                  | 0.00000000  | 0.00000000  | 0.95664700  | S  | 0.00000000  | 1.02591000  | -1.52316800 |
| S                                  | 0.00000000  | 1.76161800  | -0.32432800 | S  | 0.00000000  | 0.00000000  | 2.92631800  |
| S                                  | 0.00000000  | -1.76161800 | -0.32432800 | S  | 0.00000000  | -1.02591000 | -1.52316800 |
| Li                                 | 0.00000000  | 0.00000000  | -1.64262300 | Li | 0.00000000  | 0.00000000  | 0.64009200  |
| <b>3C</b>                          |             |             |             |    |             |             |             |
|                                    | X           | Y           | Z           |    |             |             |             |
| S                                  | -0.98413300 | 0.91259800  | 0.00000000  |    |             |             |             |
| S                                  | 0.18627600  | 2.56684200  | 0.00000000  |    |             |             |             |
| S                                  | 0.79785700  | -3.25493900 | 0.00000000  |    |             |             |             |
| Li                                 | 0.00000000  | -1.19733600 | 0.00000000  |    |             |             |             |
| <b><math>\text{LiS}_3</math></b>   |             |             |             |    |             |             |             |
| <b>3A'</b>                         |             |             | <b>3B'</b>  |    |             |             |             |
|                                    | X           | Y           | Z           |    | X           | Y           | Z           |
| S                                  | 0.00000000  | 0.00000000  | 0.89262600  | S  | 0.000000    | -1.170420   | 0.000000    |
| S                                  | 0.00000000  | 1.69226700  | -0.27615900 | S  | -1.860638   | -0.433041   | 0.000000    |
| S                                  | 0.00000000  | -1.69226700 | -0.27615900 | S  | 1.925430    | 1.354552    | 0.000000    |
| Li                                 | 0.00000000  | 0.00000000  | -1.81497600 | Li | -0.345558   | 1.327511    | 0.000000    |
| <b>3C'</b>                         |             |             |             |    |             |             |             |
|                                    | X           | Y           | Z           |    |             |             |             |
| S                                  | -0.00000100 | 0.89268400  | -0.00000700 |    |             |             |             |
| S                                  | 1.69236000  | -0.27620400 | 0.00000600  |    |             |             |             |
| S                                  | -1.69235900 | -0.27620400 | 0.00000600  |    |             |             |             |
| Li                                 | 0.00000100  | -1.81480500 | -0.00002900 |    |             |             |             |
| <b><math>\text{LiS}_4^-</math></b> |             |             |             |    |             |             |             |
| <b>4A</b>                          |             |             | <b>4B</b>   |    |             |             |             |
|                                    | X           | Y           | Z           |    | X           | Y           | Z           |
| S                                  | 0.00000000  | 2.16217600  | 0.73236700  | S  | -1.02614600 | -0.00000600 | 2.17083900  |
| S                                  | 0.62509400  | 0.87006000  | -0.87055300 | S  | 0.00000700  | 1.02614800  | -2.17083800 |
| S                                  | -0.62509400 | -0.87006000 | -0.87055300 | S  | 1.02614800  | 0.00000400  | 2.17083300  |
| S                                  | 0.00000000  | -2.16217600 | 0.73236700  | S  | -0.00000300 | -1.02614900 | -2.17083400 |
| Li                                 | 0.00000000  | 0.00000000  | 1.47398200  | Li | -0.00000500 | 0.00000400  | 0.00000000  |

| <b>4C</b> |             |             | <b>4D</b>   |    |          |          |          |
|-----------|-------------|-------------|-------------|----|----------|----------|----------|
|           | X           | Y           | Z           |    | X        | Y        | Z        |
| S         | -1.02679000 | 0.00000000  | 2.12635800  | Li | -1.99617 | -0.00001 | -0.93223 |
| S         | 0.00000000  | 1.02679000  | -2.12635800 | S  | -0.94581 | -1.73323 | -0.06420 |
| S         | 1.02679000  | 0.00000000  | 2.12635800  | S  | 0.22300  | -0.00000 | 0.59878  |
| S         | 0.00000000  | -1.02679000 | -2.12635800 | S  | 2.04291  | 0.00001  | -0.29560 |
| Li        | 0.00000000  | 0.00000000  | 0.00000000  | S  | -0.94582 | 1.73322  | -0.06420 |

| <b>4E</b> |             |             | <b>4F</b>   |    |             |             |             |
|-----------|-------------|-------------|-------------|----|-------------|-------------|-------------|
|           | X           | Y           | Z           |    | X           | Y           | Z           |
| Li        | 1.06571000  | 0.00051000  | 0.00047000  | Li | -1.04474000 | -0.00002000 | -0.00090000 |
| S         | -1.96406000 | -0.00030000 | -0.00015000 | S  | -3.28225000 | -0.00001000 | 0.00058000  |
| S         | -0.79375000 | 1.67887000  | -0.00009000 | S  | 0.76586000  | 1.66671000  | -0.00041000 |
| S         | -0.79291000 | -1.67888000 | -0.00008000 | S  | 1.94638000  | 0.00002000  | 0.00041000  |
| S         | 3.35090000  | 0.00021000  | 0.00023000  | S  | 0.76590000  | -1.66671000 | -0.00041000 |

| <b>4G</b> |             |             |             |
|-----------|-------------|-------------|-------------|
|           | X           | Y           | Z           |
| Li        | 0.96454000  | -0.00609000 | -0.16139000 |
| S         | -1.08276000 | -1.42920000 | -0.53226000 |
| S         | 3.25478000  | -0.00086000 | 0.06056000  |
| S         | -1.27449000 | 0.00107000  | 1.03476000  |
| S         | -1.07838000 | 1.43013000  | -0.53279000 |

**LiS<sub>4</sub>**

| <b>4A'</b> |             |             | <b>4B'</b>  |    |             |             |             |
|------------|-------------|-------------|-------------|----|-------------|-------------|-------------|
|            | X           | Y           | Z           |    | X           | Y           | Z           |
| S          | -1.88852700 | 0.83027000  | -0.05138600 | S  | -2.29429600 | 0.96132800  | 0.00022300  |
| S          | -1.07299900 | -1.02846400 | 0.09031700  | S  | -1.92794100 | -0.99830900 | -0.00027500 |
| S          | 1.07302000  | -1.02843700 | -0.09024200 | S  | 1.92819500  | -0.99832900 | 0.00027000  |
| S          | 1.88852500  | 0.83028800  | 0.05120200  | S  | 2.29393800  | 0.96158800  | -0.00023500 |
| Li         | -0.00010000 | 2.11383000  | 0.00058300  | Li | 0.00055400  | 0.39318300  | 0.00008800  |

| <b>4C'</b> |             |             | <b>4D'</b>  |    |             |             |             |
|------------|-------------|-------------|-------------|----|-------------|-------------|-------------|
|            | X           | Y           | Z           |    | X           | Y           | Z           |
| S          | 2.09433900  | -0.00007200 | -0.19288100 | S  | 0.00000000  | 0.99487500  | 2.15165400  |
| S          | -0.92243600 | 1.69637200  | -0.04787700 | S  | 0.99487500  | 0.00000000  | -2.15165400 |
| S          | -0.92263400 | -1.69650900 | -0.04789200 | S  | 0.00000000  | -0.99487500 | 2.15165400  |
| Li         | -2.38651200 | 0.00073100  | -0.53318000 | S  | -0.99487500 | 0.00000000  | -2.15165400 |
| S          | 0.19820200  | 0.00007200  | 0.38862200  | Li | 0.00000000  | 0.00000000  | 0.00000000  |

| <b>4E'</b> |             |             | <b>4F'</b>  |    |             |             |             |
|------------|-------------|-------------|-------------|----|-------------|-------------|-------------|
|            | X           | Y           | Z           | X  | Y           | Z           |             |
| Li         | -0.48767000 | -1.28433000 | 0.00115000  | Li | -0.54510000 | 0.00073000  | -1.37000000 |
| S          | -2.70784000 | -0.58845000 | -0.00020000 | S  | -2.49099000 | 0.00010000  | -0.08922000 |
| S          | 1.84674000  | -1.20801000 | -0.00004000 | S  | 0.37281000  | -0.00030000 | 1.01236000  |
| S          | 1.49623000  | 0.79790000  | -0.00017000 | S  | 1.11006000  | -1.42951000 | -0.33331000 |
| S          | -0.54369000 | 1.23937000  | 0.00020000  | S  | 1.11033000  | 1.42957000  | -0.33295000 |

| <b>4G'</b> |             |             |             |
|------------|-------------|-------------|-------------|
|            | X           | Y           | Z           |
| Li         | -2.01949000 | 0.38638000  | 0.00010000  |
| S          | 1.20319000  | -0.54173000 | 0.00014000  |
| S          | 3.14913000  | -0.34298000 | -0.00011000 |
| S          | 0.17808000  | 1.21264000  | 0.00001000  |
| S          | -4.15175000 | -0.40037000 | -0.00005000 |

**LiS<sub>5</sub><sup>-</sup>**

| <b>5A</b> |             |             | <b>5B</b>   |    |             |             |             |
|-----------|-------------|-------------|-------------|----|-------------|-------------|-------------|
|           | X           | Y           | Z           | X  | Y           | Z           |             |
| S         | 0.95912100  | -1.08683800 | 0.00000000  | S  | 0.00000000  | 0.00000000  | 1.65446700  |
| S         | -0.23290100 | -0.82564500 | 1.76126700  | S  | 0.00000000  | 1.71367300  | 0.33481700  |
| S         | -0.23290100 | -0.82564500 | -1.76126700 | S  | 0.00000000  | -1.71367300 | 0.33481700  |
| S         | -0.23290100 | 1.23553400  | -2.27912200 | S  | -1.60597300 | -1.62240500 | -1.02348400 |
| S         | -0.23290100 | 1.23553400  | 2.27912200  | S  | 1.60597300  | 1.62240500  | -1.02348400 |
| Li        | -0.14675800 | 1.42432000  | 0.00000000  | Li | 0.00000000  | 0.00000000  | -1.47803600 |

| <b>5C</b> |             |             | <b>5D</b>   |    |             |             |            |
|-----------|-------------|-------------|-------------|----|-------------|-------------|------------|
|           | X           | Y           | Z           | X  | Y           | Z           |            |
| S         | 0.00000000  | 1.68064800  | 1.39015700  | S  | 0.23387100  | 3.65974200  | 0.00000000 |
| S         | -1.02422000 | 0.00000000  | -2.62657600 | S  | -0.78981200 | -3.89814400 | 0.00000000 |
| S         | 0.00000000  | 0.00000000  | 2.55970200  | S  | -1.42617600 | -0.53747000 | 0.00000000 |
| S         | 0.00000000  | -1.68064800 | 1.39015700  | Li | 0.00000000  | 1.32222900  | 0.00000000 |
| S         | 1.02422000  | 0.00000000  | -2.62657600 | S  | 0.00338600  | -2.04892000 | 0.00000000 |
| Li        | 0.00000000  | 0.00000000  | -0.46326700 | S  | 1.97873200  | 2.57687300  | 0.00000000 |



| <b>5E</b> |             |             | <b>5F</b>   |    |             |             |             |
|-----------|-------------|-------------|-------------|----|-------------|-------------|-------------|
|           | X           | Y           | Z           |    | X           | Y           | Z           |
| S         | 1.08025000  | -1.10444000 | -0.24863000 | S  | 0.90770000  | -0.09071000 | 1.26203000  |
| S         | -2.38138000 | -1.07364000 | -0.21951000 | S  | 3.90735000  | 0.02644000  | -0.36437000 |
| S         | -0.77401000 | 1.96151000  | -0.16413000 | S  | -3.24463000 | -1.01878000 | -0.28285000 |
| Li        | 1.17832000  | 1.07985000  | -1.02127000 | Li | -1.24333000 | -0.02088000 | 0.28573000  |
| S         | -0.95203000 | 0.03288000  | 0.65647000  | S  | 1.90628000  | 0.03772000  | -0.53223000 |
| S         | 2.80623000  | -0.01879000 | 0.16728000  | S  | -3.24359000 | 1.04924000  | -0.13615000 |

| <b>5G</b> |             |             |             |
|-----------|-------------|-------------|-------------|
|           | X           | Y           | Z           |
| S         | 0.00000000  | 1.80678000  | -0.09463000 |
| S         | 0.00000000  | 1.10175000  | -1.98427000 |
| S         | -0.00000000 | -1.10175000 | -1.98427000 |
| S         | -0.00000000 | -1.80678000 | -0.09463000 |
| Li        | 0.00000000  | 0.00000000  | 1.57487000  |
| S         | 0.00000000  | 0.00000000  | 3.86252000  |

**LiS<sub>5</sub>**

| <b>5A'</b> |             |             | <b>5B'</b>  |    |             |             |             |
|------------|-------------|-------------|-------------|----|-------------|-------------|-------------|
|            | X           | Y           | Z           |    | X           | Y           | Z           |
| S          | 0.98646100  | -1.15897800 | 0.00000000  | S  | 0.07309000  | 1.65227000  | -0.07270500 |
| S          | -0.28686500 | -0.78684800 | 1.68670800  | S  | 1.90742400  | 0.46790600  | -0.44099400 |
| S          | -0.28686500 | -0.78684800 | -1.68670800 | S  | -1.38336100 | 0.41616600  | 0.78974200  |
| S          | -0.28686500 | 1.23837500  | -2.01451800 | S  | -2.30031200 | -0.80987200 | -0.62585100 |
| S          | -0.28686500 | 1.23837500  | 2.01451800  | S  | 1.80659600  | -1.37938100 | 0.29356300  |
| Li         | 0.85866700  | 1.36493100  | 0.00000000  | Li | -0.55166400 | -1.85114200 | 0.29996800  |

| <b>5C'</b> |             |             | <b>5D'</b>  |    |             |             |             |
|------------|-------------|-------------|-------------|----|-------------|-------------|-------------|
|            | X           | Y           | Z           |    | X           | Y           | Z           |
| S          | -0.47185200 | -1.38924300 | -0.64210500 | S  | 0.93922400  | 1.61315800  | -0.55082300 |
| S          | 1.96116000  | -0.67679800 | 0.66135200  | S  | 1.68400000  | -1.62863000 | -0.01307700 |
| S          | -2.04762200 | -0.55231400 | 0.31516000  | S  | -2.32159300 | 0.80149300  | 0.48908600  |
| S          | -1.99286600 | 1.47248600  | 0.09793000  | Li | -0.08471700 | -0.44405100 | -0.97831700 |
| S          | 2.52142300  | 0.97069400  | -0.29241400 | S  | 2.14122200  | 0.30112700  | 0.50042800  |
| Li         | 0.15870100  | 0.93426700  | -0.74625600 | S  | -2.42696800 | -1.00388800 | -0.24217900 |

| <b>5E'</b> |             |             | <b>5F'</b>  |    |             |             |             |
|------------|-------------|-------------|-------------|----|-------------|-------------|-------------|
|            | X           | Y           | Z           | X  | Y           | Z           |             |
| S          | -1.77914000 | -1.02069000 | -0.55630000 | S  | -3.22681000 | -0.69744000 | -0.77640000 |
| S          | 2.34137000  | -1.24081000 | 0.59194000  | S  | 3.90070000  | 0.15830000  | -0.32129000 |
| S          | 1.09900000  | 1.85004000  | 0.06605000  | S  | 0.93410000  | -0.79517000 | 0.90775000  |
| Li         | -1.05510000 | 1.26095000  | -0.50410000 | Li | -1.28083000 | -0.19025000 | 0.41345000  |
| S          | 1.36619000  | -0.04747000 | -0.61211000 | S  | 1.96683000  | 0.45223000  | -0.30667000 |
| S          | -2.82960000 | 0.22251000  | 0.60494000  | S  | -3.33467000 | 0.91775000  | 0.41908000  |

| <b>5G'</b> |             |             |             |
|------------|-------------|-------------|-------------|
|            | X           | Y           | Z           |
| S          | 2.63704000  | 0.00103000  | -0.88759000 |
| S          | 2.11169000  | -0.00112000 | 1.01621000  |
| S          | -1.67889000 | -1.43767000 | -0.50103000 |
| S          | -1.67905000 | 1.43860000  | -0.49849000 |
| Li         | 0.22909000  | 0.00085000  | -0.75311000 |
| S          | -1.43374000 | -0.00099000 | 1.01211000  |

**Li<sub>2</sub>S<sub>4</sub><sup>-</sup>**

| <b>2-4A</b> |             |             | <b>2-4B</b> |    |             |             |             |
|-------------|-------------|-------------|-------------|----|-------------|-------------|-------------|
|             | X           | Y           | Z           | X  | Y           | Z           |             |
| S           | 1.10494200  | 0.00000000  | -1.93666800 | S  | 1.79147100  | 1.06532100  | 0.00000000  |
| S           | 0.00000000  | 1.02732900  | 2.00833100  | S  | -1.79147100 | 1.06532100  | 0.00000000  |
| S           | -1.10494200 | 0.00000000  | -1.93666800 | S  | 1.79147100  | -1.06532100 | 0.00000000  |
| S           | 0.00000000  | -1.02732900 | 2.00833100  | S  | -1.79147100 | -1.06532100 | 0.00000000  |
| Li          | 0.00000000  | -1.28993400 | -0.38220400 | Li | 0.00000000  | 0.00000000  | 1.23076300  |
| Li          | 0.00000000  | 1.28993400  | -0.38220400 | Li | 0.00000000  | 0.00000000  | -1.23076300 |

| <b>2-4C</b> |             |             | <b>2-4D</b> |    |             |             |             |
|-------------|-------------|-------------|-------------|----|-------------|-------------|-------------|
|             | X           | Y           | Z           | X  | Y           | Z           |             |
| S           | -1.65004200 | 1.41711800  | 0.29893000  | S  | -0.12930500 | 1.72794200  | 0.36193800  |
| S           | -1.21569500 | -0.37826800 | -0.75553400 | S  | -1.46307100 | 0.37779000  | -0.60124100 |
| S           | -0.14790100 | -1.68705900 | 0.55941000  | S  | 2.54319000  | -0.35722200 | -0.17276300 |
| S           | 2.68636500  | 0.64061900  | -0.07208500 | S  | -1.18740200 | -1.52619400 | 0.38550800  |
| Li          | 0.53480800  | 0.79859200  | 0.88129300  | Li | 0.73657900  | -0.27225000 | 1.26964300  |
| Li          | 1.21064700  | -0.75811400 | -1.04513500 | Li | 0.52522400  | -0.91343800 | -1.12799900 |

| <b>2-4E</b> |             |             | <b>2-4F</b> |    |             |             |             |
|-------------|-------------|-------------|-------------|----|-------------|-------------|-------------|
|             | X           | Y           | Z           |    | X           | Y           | Z           |
| S           | -0.24923000 | -1.19211000 | 1.76128000  | Li | 0.00000000  | 1.37308000  | 1.43134000  |
| S           | -0.24923000 | -1.19211000 | -1.76128000 | Li | -0.00000000 | -1.37308000 | 1.43134000  |
| S           | -0.27109000 | 2.83608000  | 0.00000000  | S  | 0.00000000  | 1.77012000  | -0.86292000 |
| Li          | -0.24923000 | 1.06017000  | -1.38361000 | S  | 0.00000000  | 0.00000000  | 3.14275000  |
| S           | 0.86302000  | -0.84943000 | 0.00000000  | S  | 0.00000000  | -0.00000000 | -1.95366000 |
| Li          | -0.24923000 | 1.06017000  | 1.38361000  | S  | -0.00000000 | -1.77012000 | -0.86292000 |

| <b>2-4G</b> |             |            |             |
|-------------|-------------|------------|-------------|
|             | X           | Y          | Z           |
| S           | -3.51426000 | -0.56124   | -0.10188000 |
| S           | 2.10349000  | -1.29586   | -0.34902000 |
| S           | 0.37015000  | 1.73576    | -0.22572000 |
| Li          | -1.35384000 | 0.13106    | 0.10167000  |
| S           | 0.99981000  | 0.01368000 | 0.95828000  |
| Li          | 1.57153000  | 0.44313000 | -1.60389000 |

**Li<sub>2</sub>S<sub>4</sub>**

| <b>2-4A'</b> |             |             | <b>2-4B'</b> |    |             |             |             |
|--------------|-------------|-------------|--------------|----|-------------|-------------|-------------|
|              | X           | Y           | Z            |    | X           | Y           | Z           |
| S            | 0.95592000  | 1.60754500  | -0.81854000  | S  | -0.50317300 | -0.93441400 | 1.71568600  |
| S            | -0.95592000 | -1.60754500 | -0.81854000  | S  | -0.50317300 | -0.93441400 | -1.71568600 |
| S            | 0.95592000  | 0.51263900  | 1.01385500   | S  | 0.62195500  | 1.79665900  | 0.00000000  |
| S            | -0.95592000 | -0.51263900 | 1.01385500   | Li | -0.50317300 | 1.29711100  | -1.92024400 |
| Li           | -1.21820500 | 0.69827100  | -1.04168100  | S  | 0.57308100  | -0.41424700 | 0.00000000  |
| Li           | 1.21820500  | -0.69827100 | -1.04168100  | Li | -0.50317300 | 1.29711100  | 1.92024400  |

| <b>2-4C'</b> |             |             | <b>2-4D'</b> |    |             |             |             |
|--------------|-------------|-------------|--------------|----|-------------|-------------|-------------|
|              | X           | Y           | Z            |    | X           | Y           | Z           |
| S            | 0.51950600  | 0.90352000  | -1.81621200  | S  | 1.05067300  | 0.00000000  | -1.91114400 |
| S            | -0.51950600 | 0.87225800  | 1.88142500   | S  | 0.00000000  | 1.00234700  | 1.97373500  |
| S            | -0.51950600 | -0.90352000 | -1.81621200  | S  | -1.05067300 | 0.00000000  | -1.91114400 |
| S            | 0.51950600  | -0.87225800 | 1.88142500   | S  | 0.00000000  | -1.00234700 | 1.97373500  |
| Li           | 1.31522600  | -0.77920500 | -0.34779900  | Li | 0.00000000  | -1.38238800 | -0.33382200 |
| Li           | -1.31522600 | 0.77920500  | -0.34779900  | Li | 0.00000000  | 1.38238800  | -0.33382200 |

| <b>2-4E'</b> |            |          | <b>2-4F'</b> |    |            |            |            |
|--------------|------------|----------|--------------|----|------------|------------|------------|
|              | X          | Y        | Z            |    | X          | Y          | Z          |
| S            | -0.0436400 | -0.88296 | 1.7570500    | S  | 0.0000000  | 1.1152300  | 0.6984400  |
| S            | -0.0436400 | -0.88296 | -1.7570500   | S  | 0.0000000  | -1.1152300 | 0.6984400  |
| S            | -0.0342900 | 3.14462  | -0.0000000   | S  | -1.3460600 | -1.7020900 | -0.7894100 |
| Li           | -0.0436400 | 1.42527  | -1.5130100   | S  | 1.3460600  | 1.7020900  | -0.7894100 |
| S            | 0.1379300  | -1.91318 | 0.0000000    | Li | 0.0000000  | 0.0000000  | -1.7464900 |
| Li           | -0.0436400 | 1.42527  | 1.5130100    | Li | 0.0000000  | 0.0000000  | 2.7167900  |

| <b>2-4G'</b> |            |            |            |
|--------------|------------|------------|------------|
|              | X          | Y          | Z          |
| S            | -1.2374500 | -1.5993200 | -0.2017700 |
| S            | -1.5763800 | 0.2510900  | 0.5479800  |
| S            | 2.7760500  | -0.4456900 | 0.1184200  |
| S            | -0.3824900 | 1.6514900  | -0.4417900 |
| Li           | 0.7408100  | -0.5049700 | -1.0578200 |
| Li           | 1.5006100  | 1.2645800  | 0.9360300  |
